# Supplementary material
Source: publisher figshare collection journal article supplement (https://frontiersin.figshare.com/ndownloader/files/24529229)

### Supplementary figure 5

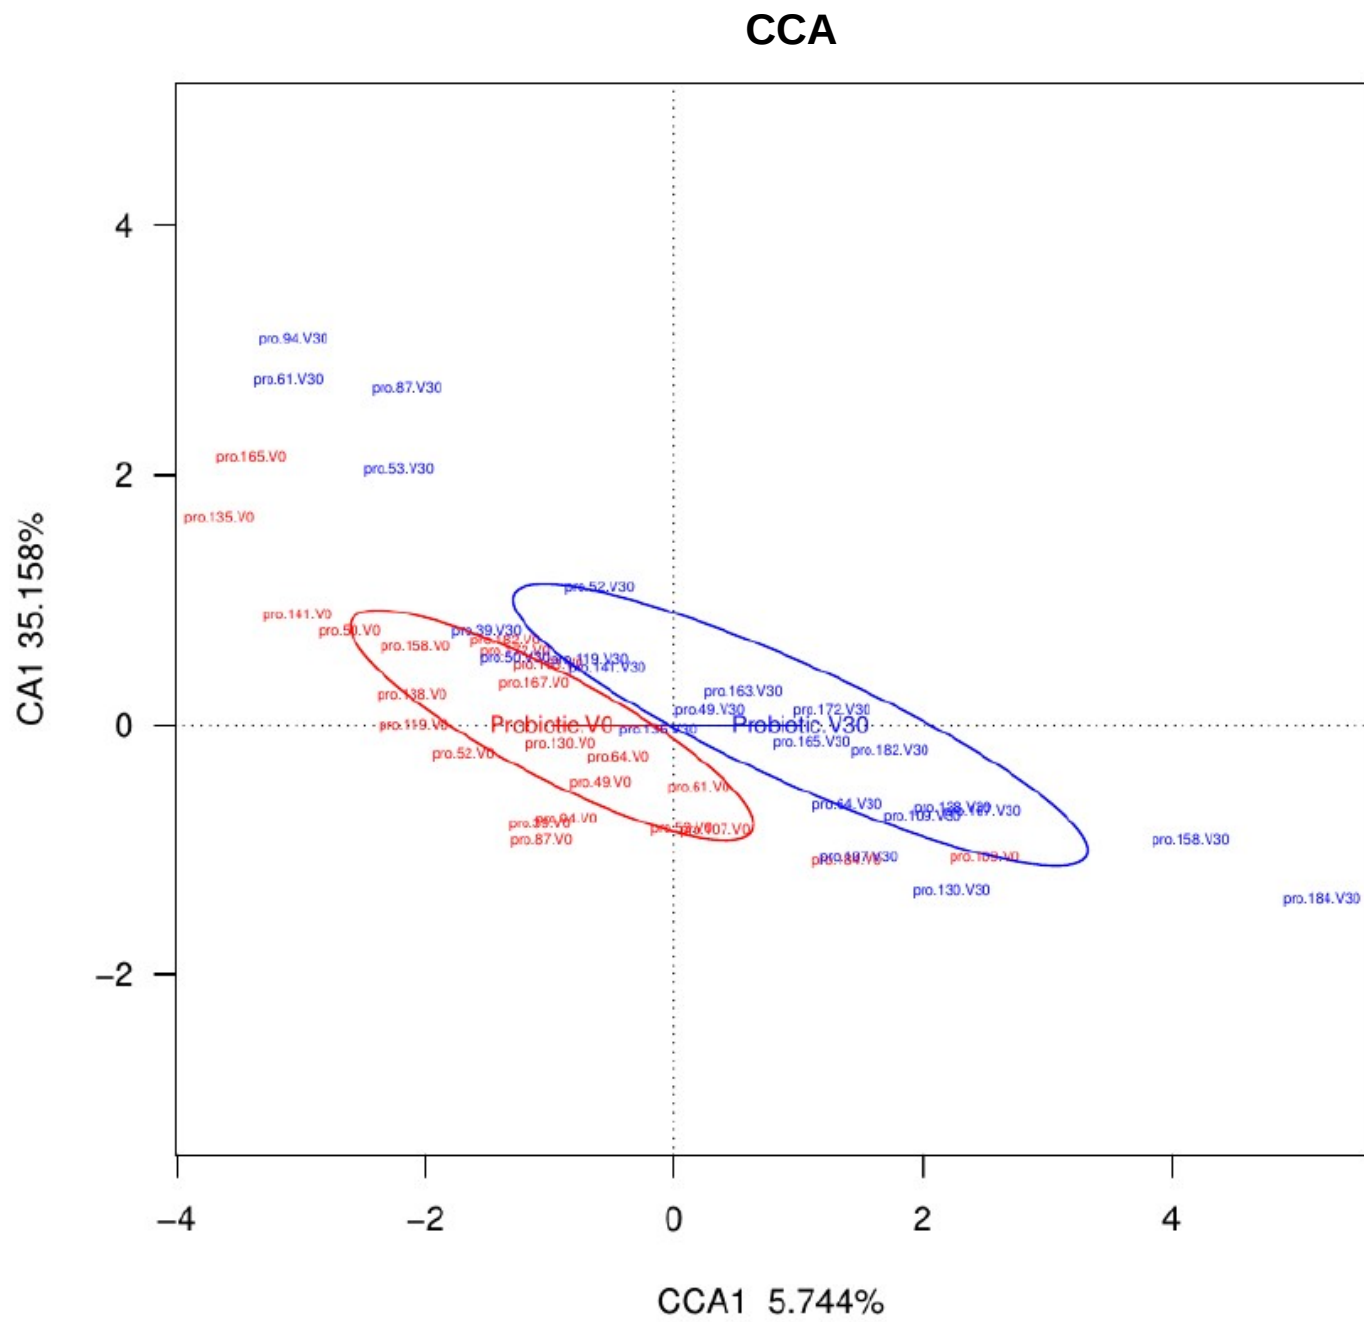

Supplement: Supplementary file [file 24529229]
